# Supplementary material
Source: PubMed Central journal article supplement (PMC2915736)
Supplement: supp_M110.104406_jbc.M110.104406-1.pdf [file supp_M110.104406_jbc.M110.104406-1.pdf]

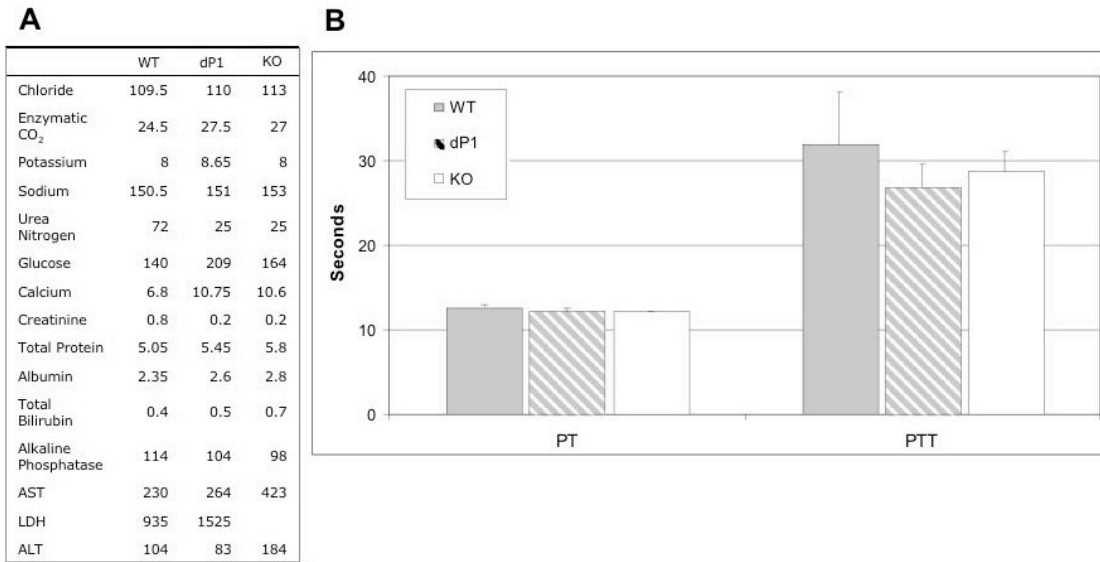

**Supplemental Figure 1: Metabolites and clotting times of ST6Gal-1 deficient animals.** A) Serum harvested from resting animals was processed by RPCI Clinical Laboratories. Results shown are an average from 2 WT, 2  $\Delta$ P1, and 1 KO animals. (B) Serum was harvested from animals 72 hours after APR elicitation by turpentine injection, placed in sodium citrate tubes, and processed by MU Research Animal Diagnostic Laboratory for clotting times. Shown is an analysis of 4 animals as the average of 2 samples in pools of 2.

|                  | G-CSF | GM-CSF                 | IL- 1a             | IL- 1b               | IL- 4              | IL- 5             | IL- 6               | IL-10               | IL-13                 | TNF-a               |                    |
|------------------|-------|------------------------|--------------------|----------------------|--------------------|-------------------|---------------------|---------------------|-----------------------|---------------------|--------------------|
| Threshold        | 71    | 6                      | 10                 | 4                    | 5                  | 7                 | 3                   | 25                  | 44                    | 7                   |                    |
| T <sup>48h</sup> | WT    | <b>4,528</b><br>± 4990 | <b>10</b><br>± 4.8 | <b>10</b><br>± 0     | <b>5</b><br>± 1.25 | <b>5</b><br>± 0.2 | <b>13</b><br>± 2.8  | <b>54</b><br>± 37.5 | <b>176</b><br>± 65    | <b>44</b><br>± 0    | <b>13</b><br>± 5   |
|                  | ΔP1   | <b>3,408</b><br>± 1105 | <b>9</b><br>± 5    | <b>10</b><br>± 0     | <b>5</b><br>± 0    | <b>5</b><br>± 0   | <b>11</b><br>± 4.6  | <b>29</b><br>± 10   | <b>136</b><br>± 94    | <b>44</b><br>± 0    | <b>13</b><br>± 5.7 |
|                  | KO    | <b>5,250</b><br>± 5915 | <b>7</b><br>± 2.2  | <b>10</b><br>± 0     | <b>4</b><br>± 0    | <b>5</b><br>± 0   | <b>13</b><br>± 12.4 | <b>43</b><br>± 18.7 | <b>* 69</b><br>± 49.2 | <b>78</b><br>± 19.5 | <b>11</b><br>± 6.3 |
| Resting          | WT    | <b>71</b><br>± 0       | <b>6</b><br>± 0    | <b>29</b><br>± 22    | <b>0</b><br>± 0    | <b>6</b><br>± 3.6 | <b>9</b><br>± 3.3   | <b>4</b><br>± 2.6   | <b>25</b><br>± 0.05   | <b>44</b><br>± 0    | <b>7</b><br>± 0    |
|                  | ΔP1   | <b>71</b><br>± 0       | <b>6</b><br>± 0    | <b>* 80</b><br>± 8.4 | <b>0</b><br>± 0    | <b>6</b><br>± 3.2 | <b>7</b><br>± 0     | <b>3</b><br>± 0     | <b>31</b><br>± 13     | <b>68</b><br>± 39   | <b>7</b><br>± 5    |
|                  | KO    | <b>71</b><br>± 0       | <b>6</b><br>± 0    | <b>39</b><br>± 34    | <b>0</b><br>± 0    | <b>5</b><br>± 0   | <b>9</b><br>± 2.1   | <b>3</b><br>± 0     | <b>25</b><br>± 0.06   | <b>132</b><br>± 92  | <b>7</b><br>± 1.2  |

**Supplemental Figure 2: Cytokine levels in ST6Gal-1 deficient animals during an APR.** Serum (50μl) from 5 individual animals of each genotype (WT, ΔP1, KO) was harvested from animals at rest or 48 hours after turpentine elicited APR and were subjected to Luminex 100 multiplex assays using a capture bead system developed by the Luminex Corporation.

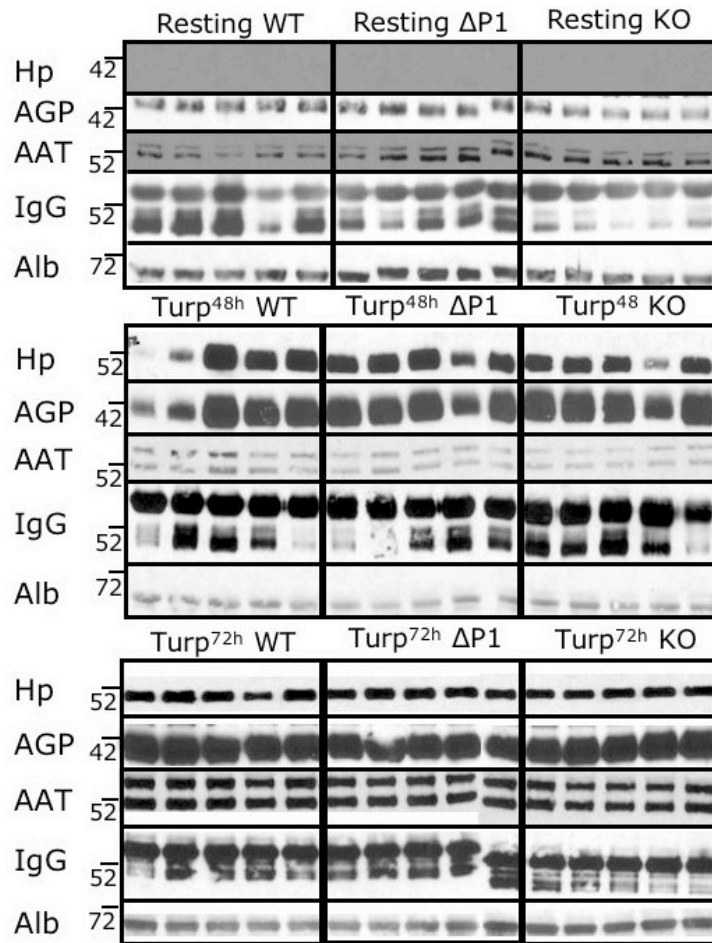

**Supplemental Figure 3: Major inflammatory proteins in ST6Gal-1 deficient animals during an APR.** Serum was collected from wild-type (WT), *Siat1*ΔP1 (dP1) or *Siat1*-null (KO) animals sacrificed at the following points: at rest (before treatment), 48 hours (Turp<sup>48h</sup>) or 72 hours (Turp<sup>72h</sup>) after turpentine treatment. For Western blot analysis, serum aliquots (10ug) were separated by 10% sodium dodecyl sulfate polyacrylamide gel electrophoresis and transferred to a PDVF membrane (Millipore). Blots were blocked in TBST containing 5% Milk for 1h at RT or 4°C overnight. Blots were probed with protein-specific primary antibodies, and subsequently incubated with appropriate horseradish-peroxidase conjugated secondary antibodies. Visualization was performed with Enhanced Chemiluminescence Reagent (Amersham) and exposed to film. Abbreviation and primary concentrations are as follows: HP = haptoglobin (1:5000); AGP = α-1- acid glycoprotein (1:5000); AAT = α-1-anti-trypsin (1:1000); IgG = Immunoglobulin G (1:7500); Alb = Albumin (Band from AGP blots). Molecular weight in kDa provided on left of each blot.
